# Supplementary material for: Anomalous Summertime CO 2 sink in the subpolar Southern Ocean promoted by early 2021 sea ice retreat
Source: Copernicus journal article supplement (doi:10.5194/egusphere-2024-2668), 2024-09-18
Supplement: Supplementary file 1 [file egusphere-2024-2668-supplement.pdf]

Supplement

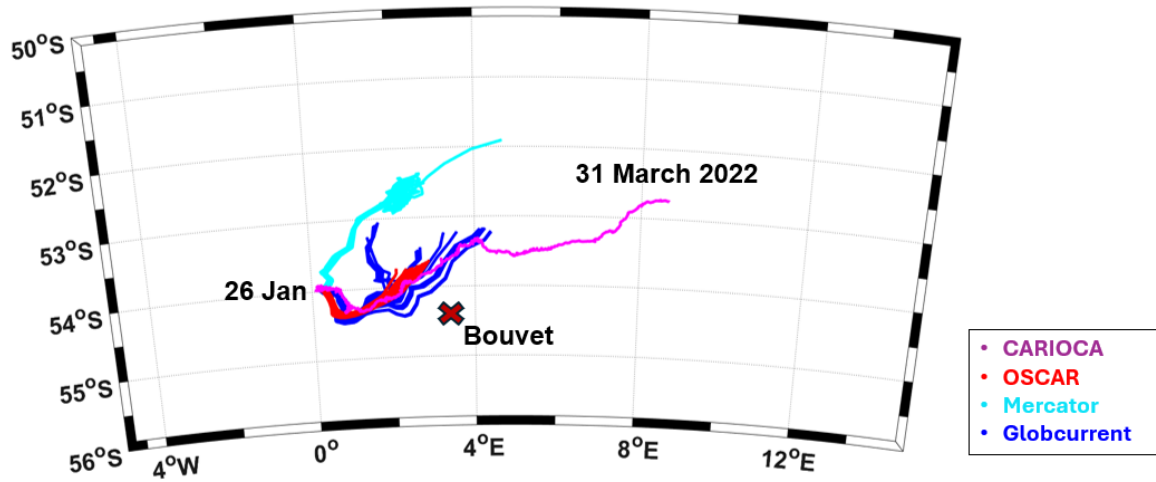

Figure S1: Trajectories (forward advection using Lagrangian analysis) of different current products (at 15 m depth) compared to CARIOCA trajectory from the 26 January 2022 to the 31 March 2022

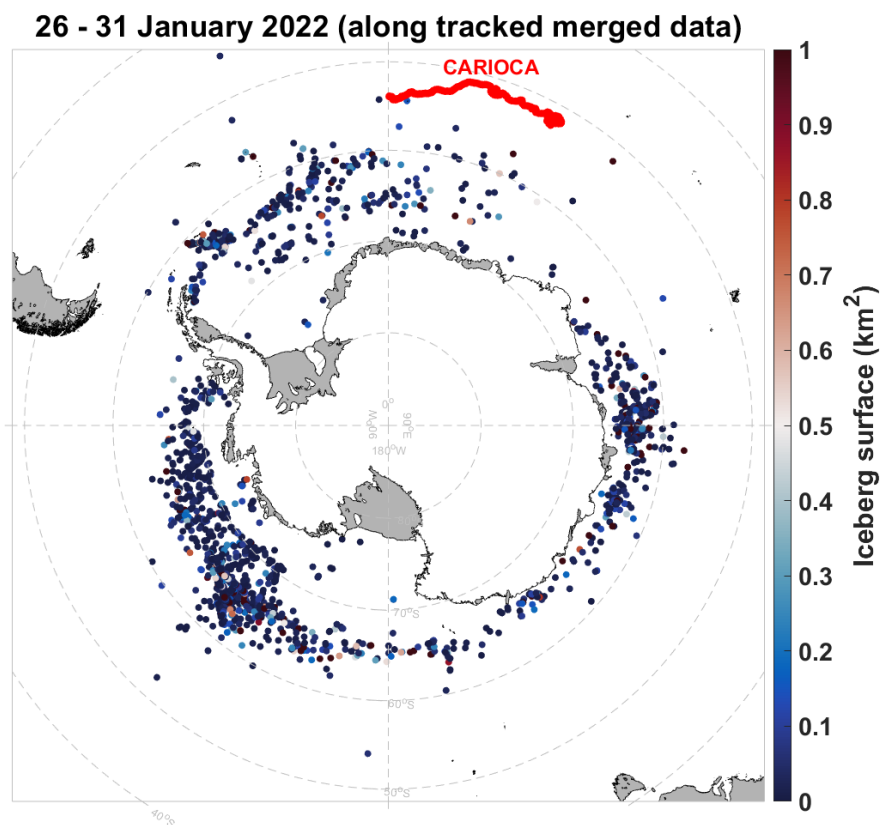

Figure S2: Presence of iceberg fragments around the CARIOCA at the end of January 2022 (along tracked merged data from Ifremer Altiberg), with the trajectory of CARIOCA shown from the 26 January to the 27 June 2022.

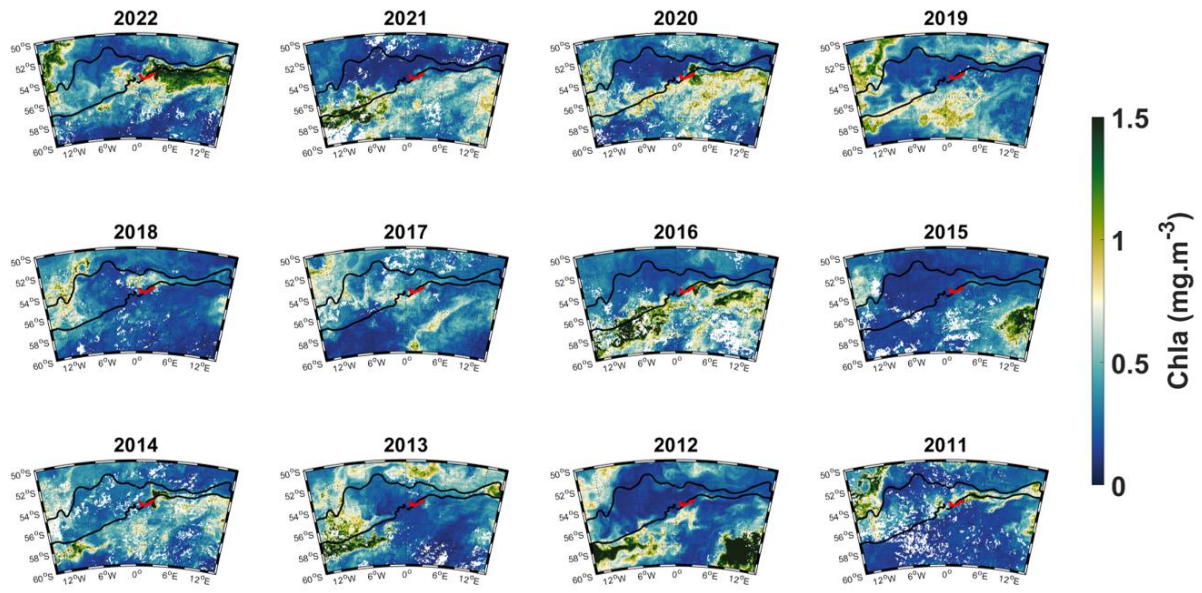

**Figure S3: CCI February Chl-a maps from 2011 to 2022, with CARIOCA position in February 2022 (in red), with fronts SACCF and SB (black lines).**

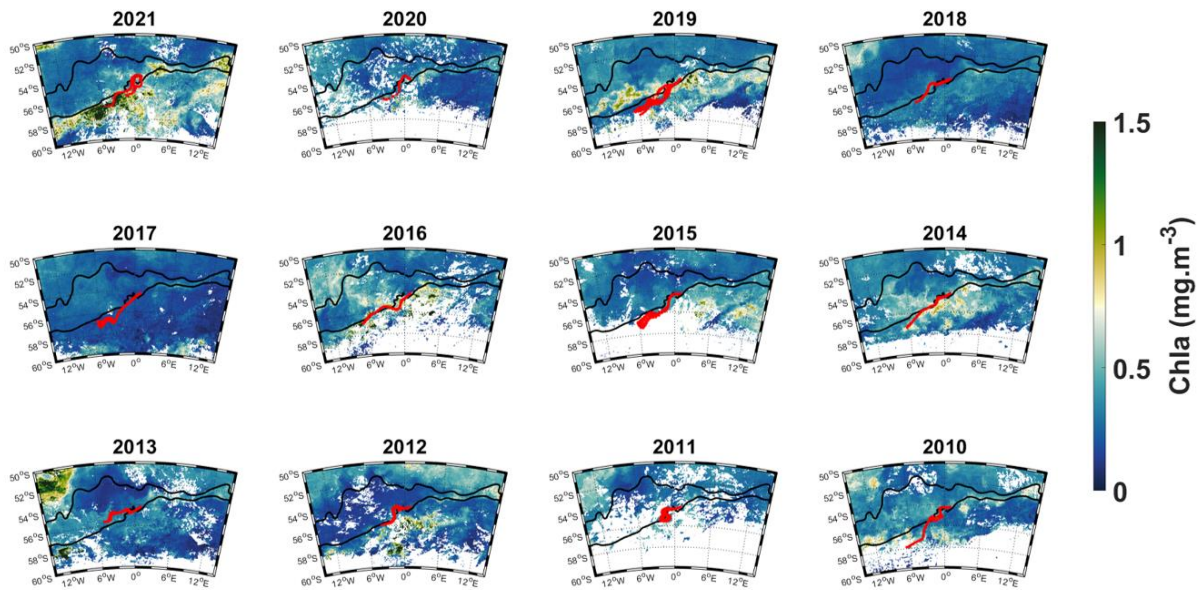

**Figure S4: CCI November Chl-a maps from 2010 to 2021, with backward trajectories (using total currents at 15 m depth, from OSCAR) from the 07/02/22 to the 01/11/21 (in red), with fronts SACCF and SB (black lines).**
